# Supplementary material for: Models for biomedical interfaces: a computational study of quinone-functionalized amorphous silica surface features
Source: Royal Society of Chemistry journal article supplement (doi:10.1039/c6cp07909a), 2017-01-01
Supplement: c6cp07909a1.pdf [file c6cp07909a1.pdf]

## ELECTRONIC SUPPORTING INFORMATION

### **Models for biomedical interfaces: computational study of quinone-functionalized amorphous silica surface features**

*Marta Corno<sup>1,\*</sup>, Massimo Delle Piane<sup>2</sup>, Patrick Choquet<sup>3</sup>, Piero Ugliengo<sup>1</sup>*

<sup>1</sup>Dipartimento di Chimica and NIS – Nanostructured Interfaces and Surfaces – Centre, Università degli Studi di Torino, via P. Giuria 7, 10125, Torino, Italy

<sup>2</sup>Faculty of Production Engineering and Bremen Center for Computational Materials Science, University of Bremen, Am Fallturm 1, 28359, Bremen, Germany

<sup>3</sup>Luxembourg Institute of Science and Technology (LIST), Materials Research and Technology Department (MRT), 5, avenue des Hauts-Fourneaux, L-4362 Esch/Alzette, Luxembourg

\*Corresponding author: [marta.corno@unito.it](mailto:marta.corno@unito.it), telephone: +390116704597

## Computational details

### Static calculations

*Basis set.* Considering the amorphous silica surface, Si atoms were represented by the 88-31G basis set of Nada et al. with  $\alpha_{sp} = 0.1930 \text{ bohr}^{-2}$  as the most diffuse shell exponent and  $\alpha_{pol} = 0.6100 \text{ bohr}^{-2}$  for polarization. O atoms were described by the 8-411G basis set of Nada et al. with  $\alpha_{sp} = 0.1810 \text{ bohr}^{-2}$  as the most diffuse shell exponent and  $\alpha_{pol} = 0.6000 \text{ bohr}^{-2}$ , while for H atoms we employed the 3-11G VTZP set of Ahlrichs et al. with  $\alpha_{sp} = 0.1031 \text{ bohr}^{-2}$  as the most diffuse shell exponent and  $\alpha_{pol} = 0.8000 \text{ bohr}^{-2}$ .

The atoms of the functionalizing quinone and of the allylamine were all described by the valence triple-zeta basis set with polarization (VTZP) of Ahlrichs et al.: a 511111-411G basis set for C, N and O (with  $\alpha_p = 0.1008 \text{ bohr}^{-2}$  as the most diffuse shell exponent and  $\alpha_{pol} = 0.8000 \text{ bohr}^{-2}$  for C,  $\alpha_p = 0.1430 \text{ bohr}^{-2}$  as the most diffuse shell exponent and  $\alpha_{pol} = 1.0000 \text{ bohr}^{-2}$  for N and with  $\alpha_p = 0.1751 \text{ bohr}^{-2}$  as the most diffuse shell exponent and  $\alpha_{pol} = 1.200 \text{ bohr}^{-2}$  for O). H atoms were represented with the same 3-11G VTZP set of Ahlrichs et al. used for the silica surface.

*Computational parameters.* The DFT exchange–correlation contribution was calculated with a numerical integration of the electronic density over a pruned grid of 75 radial points, with one sub-interval of 974 angular points. The Hamiltonian matrix was diagonalized over 4 k-points. The tolerances controlling the accuracy of the Coulomb and exchange series needed to build up the Fock matrix were set to  $10^{-6}$  (ITOL1 = ITOL2 = 6). Tolerances for the maximum allowed gradient and the maximum atomic displacement for convergence were kept at the default values (0.00045 Ha·Bohr<sup>-1</sup> and 0.00030 Bohr, respectively).

*Amorphous silica model.* The atomic fractionary coordinates of the amorphous silica surface are reported in the following input file for a CRYSTAL geometry optimization run. The label of the atomic layers for the partial optimization are indicated as well.

## Amorphous silica surface coordinates (CRYSTAL input file)

SiO2 4.5 OH density, amorphous

SLAB

1

12.60474583000 12.83351163000 83.131932

111

|    |                 |                 |                 |
|----|-----------------|-----------------|-----------------|
| 14 | -0.101575646768 | 0.255195705582  | -0.510444910111 |
| 14 | 0.351722816116  | 0.379822859992  | 1.798022172662  |
| 8  | -0.456624874881 | -0.217975239786 | 1.163961361827  |
| 8  | -0.226203601030 | -0.291984909162 | 4.647766565580  |
| 8  | -0.008813470371 | -0.294707334218 | 4.982662861440  |
| 8  | -0.428750989087 | 0.167320024230  | 6.068113157670  |
| 14 | -0.488755470557 | 0.030632622268  | -0.450885582782 |
| 8  | 0.340929453697  | -0.255716041335 | 0.782202764090  |
| 8  | 0.435685936770  | 0.358074571533  | 5.504429227280  |
| 8  | -0.396736605355 | -0.072714574494 | -0.481339835404 |
| 8  | -0.000233273891 | -0.208417329928 | 2.484756029735  |
| 8  | -0.124154827112 | 0.077677067479  | 2.234349686064  |
| 8  | 0.395609730487  | 0.256132895121  | 2.086390687758  |
| 8  | -0.400658408337 | 0.244281140310  | 1.144935373632  |
| 14 | -0.008259509073 | 0.481557650588  | 4.012649244100  |
| 8  | -0.440864917890 | -0.261751107817 | 5.325732762700  |
| 8  | -0.026476853122 | 0.359404989814  | 3.671607736120  |
| 8  | -0.178727221052 | 0.014182533608  | 4.720888154630  |
| 8  | -0.319730864280 | -0.439736890053 | 3.266090396080  |
| 14 | -0.219591163699 | -0.368183470862 | 3.309502385230  |
| 14 | 0.453901120651  | -0.295083566653 | 1.589977357111  |
| 8  | 0.431538481583  | -0.288406278047 | 3.199969396230  |
| 8  | 0.485512181687  | -0.448072642100 | 4.982815108680  |
| 8  | 0.409283447826  | 0.418745624604  | 0.442491947323  |
| 14 | 0.043726086948  | 0.248349287532  | 4.057626781950  |
| 14 | -0.029692349174 | 0.047639651068  | 1.123184847951  |
| 8  | 0.370149061396  | 0.449580317866  | 3.162851817450  |
| 8  | -0.498151825773 | -0.416493004445 | 1.206475880575  |
| 8  | -0.232129662024 | 0.261702307690  | -0.286244280785 |
| 8  | -0.105999630213 | -0.444291196150 | 3.294561356220  |
| 8  | -0.010581260392 | 0.477716316719  | -1.820976958177 |
| 8  | 0.049789598314  | -0.479405992084 | 0.645718407177  |
| 14 | 0.002721139805  | -0.187628733570 | 0.858572924585  |
| 14 | -0.405205262330 | -0.199207863883 | -0.339940427337 |
| 8  | -0.157192583576 | -0.443440741465 | 0.041183641425  |
| 8  | -0.221010632488 | -0.295113915803 | 1.960618788713  |
| 8  | 0.347609580989  | -0.289763560161 | 5.660058978380  |
| 8  | -0.234780490260 | 0.404238721846  | 4.763371107550  |
| 8  | -0.075218816982 | -0.262043558151 | 0.086438446001  |
| 14 | 0.457352893026  | -0.321070557383 | 4.761122364130  |
| 14 | 0.465496162032  | 0.439884789461  | 4.305288199780  |
| 14 | -0.045650144787 | 0.476963551522  | -0.236712266210 |
| 8  | -0.258560833327 | 0.376874314376  | 1.981674232797  |
| 8  | -0.044212156915 | -0.066551925182 | 0.440548075398  |
| 14 | -0.184549108051 | -0.317267624317 | 0.395023422010  |
| 14 | -0.319642401067 | 0.329172233355  | 0.707268479737  |
| 14 | -0.305299069219 | 0.430563953862  | 3.403175695840  |
| 14 | 0.498014240807  | 0.496264754184  | 0.004114805738  |
| 8  | -0.059641337719 | 0.356082197999  | 0.259160691129  |
| 8  | -0.424685308400 | 0.389159809172  | 3.557674598210  |
| 8  | -0.384553267764 | 0.426363805761  | -0.161987722859 |

|    |                 |                 |                 |
|----|-----------------|-----------------|-----------------|
| 8  | -0.075566066813 | 0.269383012121  | -2.126007005824 |
| 8  | -0.285266891736 | -0.265279877702 | -0.528294158959 |
| 8  | 0.392005792720  | -0.000487807369 | -0.890794317600 |
| 8  | -0.486303881356 | -0.229762907031 | -1.533287878694 |
| 8  | 0.464685752859  | -0.444254901884 | -1.431721334525 |
| 1  | -0.022079264704 | 0.412004281464  | -2.271189017046 |
| 1  | -0.046768761541 | 0.205771367629  | -2.591017935722 |
| 1  | -0.496806443969 | -0.304577831738 | -1.616904090500 |
| 1  | 0.386460010506  | -0.421524315672 | -1.466146997111 |
| 8  | 0.212719783353  | -0.392225215467 | 1.594189003815  |
| 8  | 0.124580524130  | 0.216007526474  | 2.803269897741  |
| 8  | 0.222858885844  | 0.395334002255  | 1.491611510376  |
| 8  | 0.325890646690  | -0.101935132890 | 4.663552835720  |
| 8  | 0.126851085214  | -0.214495444912 | 0.312400101437  |
| 14 | 0.230125563580  | -0.305566325660 | 0.431265878437  |
| 8  | 0.175764983060  | -0.237598329531 | 4.120905961160  |
| 8  | 0.251708554808  | -0.363496978674 | -1.061626606678 |
| 14 | 0.301416560525  | 0.026277250203  | 4.551295442560  |
| 8  | 0.103699281099  | -0.491280116599 | 3.306723403160  |
| 8  | 0.012268019714  | -0.088227010804 | 4.619023189500  |
| 14 | 0.044677878135  | -0.209843170418 | 4.020801241770  |
| 14 | 0.256099104636  | -0.193217141688 | 5.239824246980  |
| 14 | 0.145270610241  | -0.493834922764 | 1.757572040841  |
| 1  | 0.192045439939  | -0.397730210771 | -1.401887406468 |
| 8  | 0.229797833032  | 0.146140941436  | 0.572713192150  |
| 8  | 0.202458090190  | 0.059935923250  | 5.613071340750  |
| 14 | 0.182330116332  | 0.111990389836  | 2.005246323502  |
| 8  | 0.275472144110  | 0.051836261306  | 2.973808895590  |
| 1  | 0.277962007221  | 0.092129420754  | 0.101822196558  |
| 8  | 0.496462411937  | 0.074436954599  | 1.103612577042  |
| 8  | 0.405787294372  | 0.081875463552  | 4.999627575480  |
| 14 | -0.465891941741 | 0.091569512822  | 4.883613307620  |
| 8  | -0.443181436161 | 0.149634719645  | 3.421011628080  |
| 14 | -0.142969569117 | 0.111977998680  | 3.814976290020  |
| 8  | -0.040970530252 | 0.140592940407  | -0.030733635907 |
| 8  | 0.089793928556  | 0.031772261470  | 1.799780690438  |
| 8  | -0.398514456932 | -0.026735966892 | 4.955318040190  |
| 14 | -0.488873725531 | 0.182118644685  | 1.916840162223  |
| 8  | -0.242157520616 | 0.207265654619  | 3.935323001300  |
| 8  | -0.035847613239 | 0.159504939973  | 4.412719518110  |
| 8  | -0.455674254200 | 0.122072119202  | -1.469508651161 |
| 1  | -0.391919412665 | 0.153256426077  | -1.211172767388 |
| 8  | 0.005398261669  | 0.488872545144  | 5.651761267310  |
| 8  | 0.120759079630  | 0.264906989799  | 5.392236163880  |
| 8  | 0.180408608725  | -0.143695195745 | 6.507564615980  |
| 1  | -0.297621699059 | -0.285114481006 | 5.081877203920  |
| 1  | -0.088069090221 | -0.284716713595 | 5.046235156400  |
| 1  | -0.465748990597 | 0.239342424218  | 6.018234807120  |
| 1  | 0.364644774327  | 0.335931205974  | 5.431985178300  |
| 1  | -0.116205747077 | -0.041087436056 | 4.800129234440  |
| 1  | -0.221355481122 | 0.327283768782  | 4.850438112590  |
| 1  | 0.052017574166  | -0.080849975176 | 5.456558267920  |
| 1  | 0.179120041682  | 0.135457296647  | 5.773892573720  |
| 1  | -0.320139369369 | -0.025525746127 | 4.889555247430  |
| 1  | -0.315462921956 | 0.191351709419  | 3.749472617850  |
| 1  | 0.020624723322  | -0.440253172360 | 5.893526672690  |
| 1  | 0.092075269982  | 0.325093279192  | 5.942411571610  |
| 1  | 0.194691596348  | -0.071268076558 | 6.689324185300  |
| 1  | -0.448064124487 | -0.185219240769 | 5.180442383050  |

```

1      0.392672184417   -0.071311030407   -1.252638072964
OPTGEOM
ATOMONLY
FRAGMENT
57
1  2  3  7  8 10 11 12 13 14
21 24 26 28 29 31 32 33 34 35
36 39 42 43 44 45 46 48 49 51
52 53 54 55 56 57 58 59 60 61
62 63 65 66 68 74 75 76 78 80
81 86 87 89 92 93 111
ENDOPT
ENDG
14 5
0 0 8 2.0 1.0
149866.0   0.0001215
22080.6   0.0009770
4817.5    0.0055181
1273.5    0.0252000
385.11    0.0926563
128.429   0.2608729
45.4475   0.4637538
16.2589   0.2952000
0 1 8 8.0 1.0
881.111  -0.0003   0.0006809
205.84   -0.0050   0.0059446
64.8552  -0.0368   0.0312000
23.9     -0.1079   0.1084000
10.001   0.0134   0.2378000
4.4722   0.3675   0.3560066
2.034    0.5685   0.3410000
0.9079   0.2065   0.1326000
0 1 3 4.0 1.0
2.6668  -0.0491   0.0465000
1.0780  -0.1167  -0.1005000
0.3682  0.2300  -1.0329000
0 1 1 0.0 1.0
0.193   1.0      1.0
0 3 1 0. 1.
0.610   1.0
8 5
0 0 8 2.0 1.0
8966.29   0.0010
1240.17   0.0091
252.114   0.0513
70.359    0.1702
23.9025   0.3662
9.2075    0.3859
3.9847    0.1471
1.2266    0.0695
0 1 4 6.0 1.00
44.9344  -0.0098   0.0107
10.3978  -0.0893   0.0670
3.2970   -0.0373   0.2100
1.2340   0.3730   0.3542
0 1 1 0.0 1.00
0.4536   1.0      1.0
0 1 1 0.0 1.00
0.1810   1.0      1.0

```

```

0 3 1 0. 1.
      0.60    1.0
1 4
0 0 3 1.0 1.0
      34.0613410    0.60251978E-02
      5.1235746    0.45021094E-01
      1.1646626    0.20189726
0 0 1 0.0 1.0
      0.32723041    1.0000000
0 0 1 0.0 1.0
      0.10307241    1.0000000
0 2 1 0.0 1.0
      0.8000000    1.0000000
99 0
END
DFT
EXCHANGE
PBE
CORRELAT
PBE
XLGRID
END
SHRINK
1 1
GRIMME
0.75 20. 25.
3
1 0.14 1.001
8 0.70 1.342
14 9.23 1.716
END

```

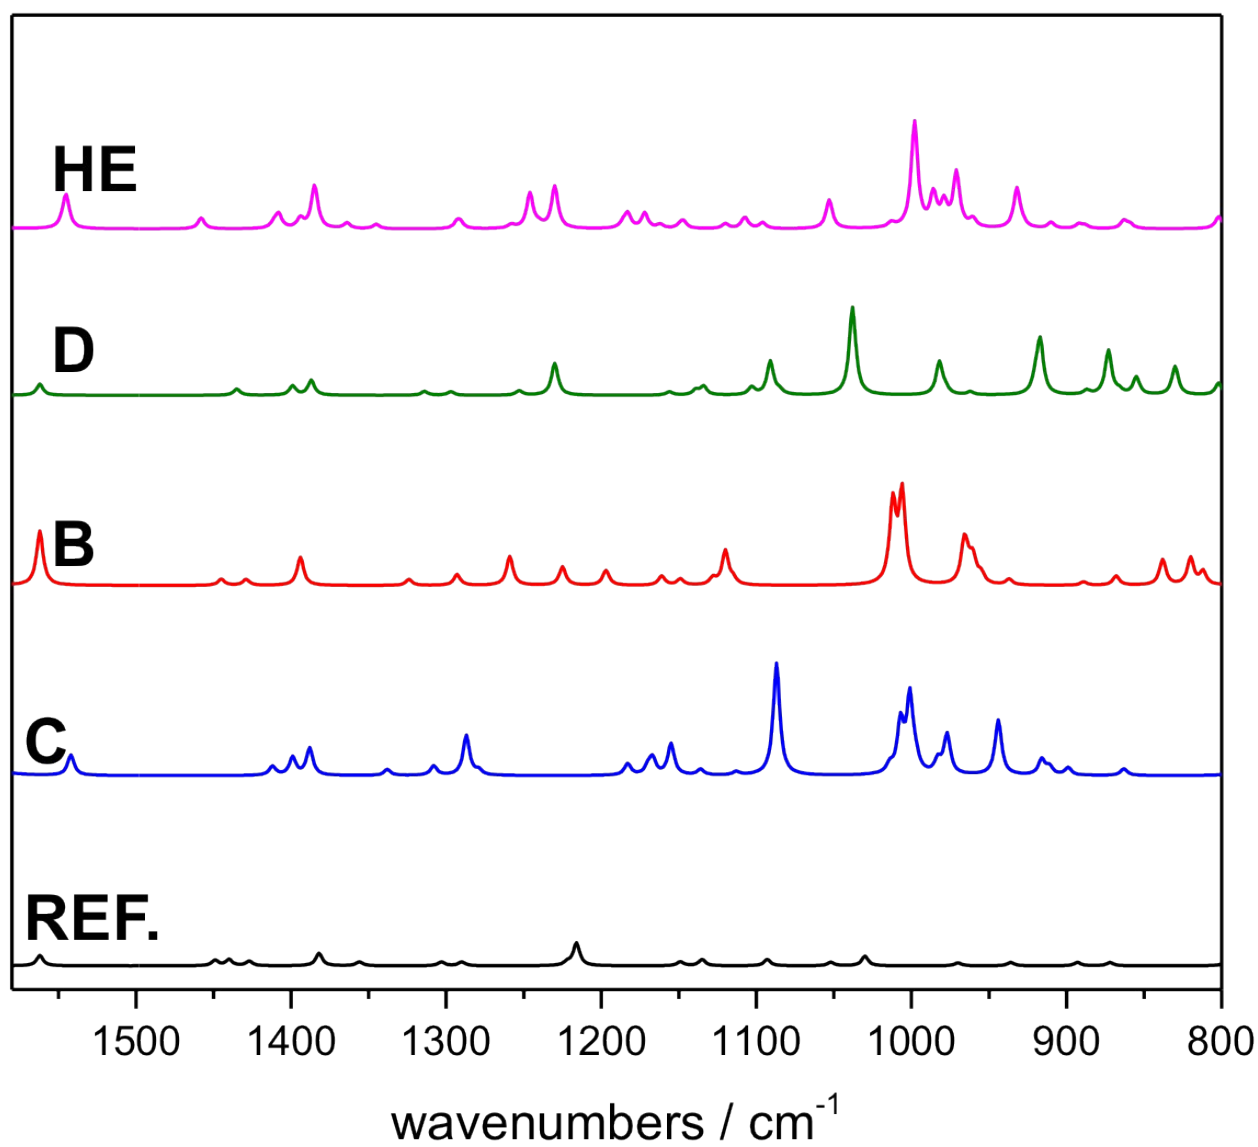

**Figure ES11.** Complete computed IR spectra for the three mono-functionalized C, B and D models and for the bi-functionalized case HE, compared to the reference molecule, 4-ethyl-o-benzoquinone, displayed in Figure 1c) of the manuscript.

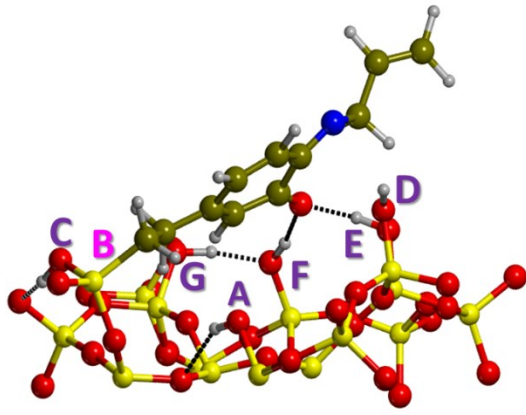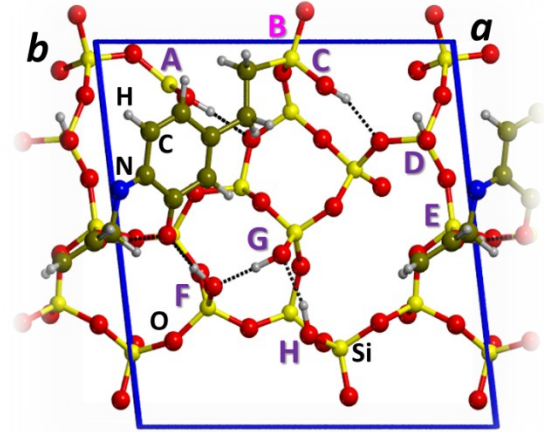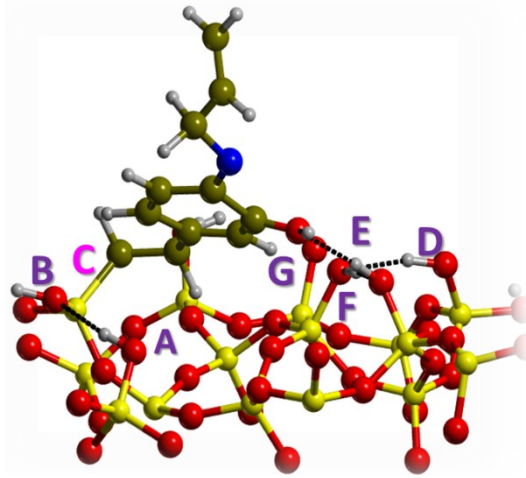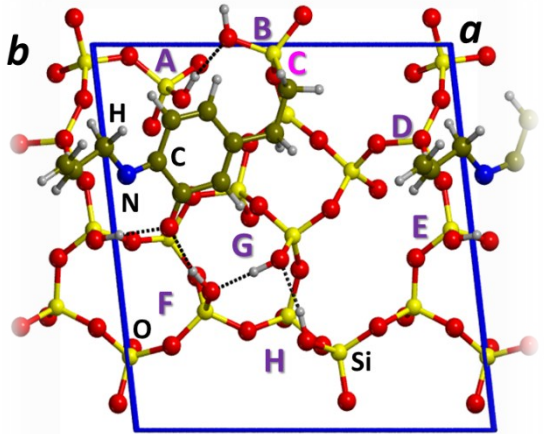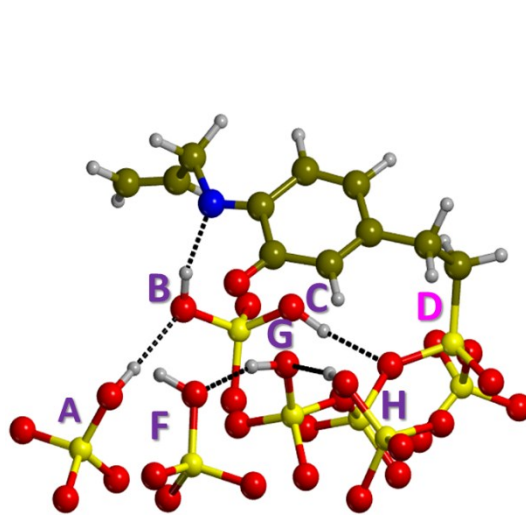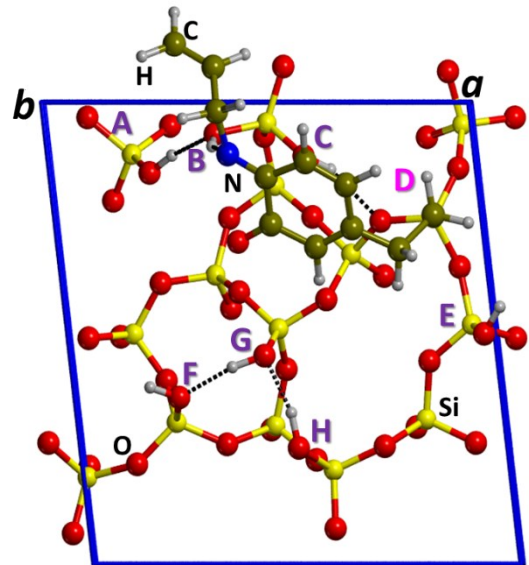



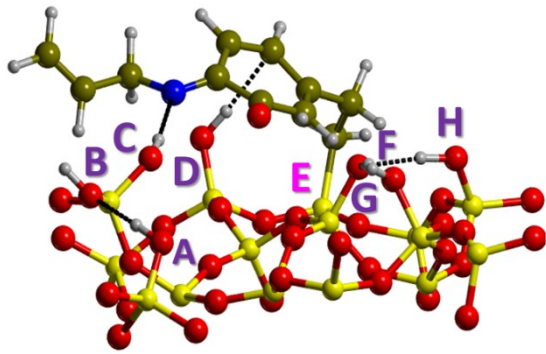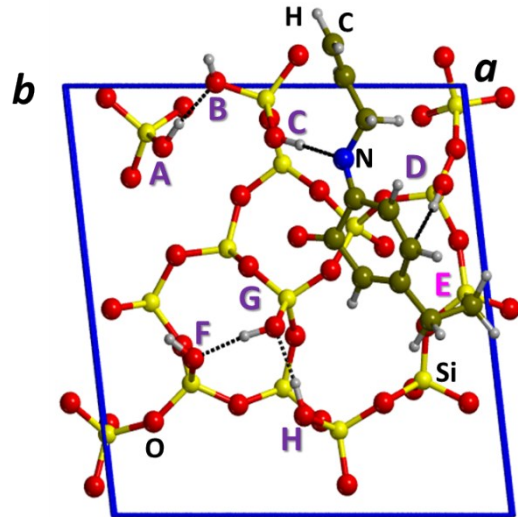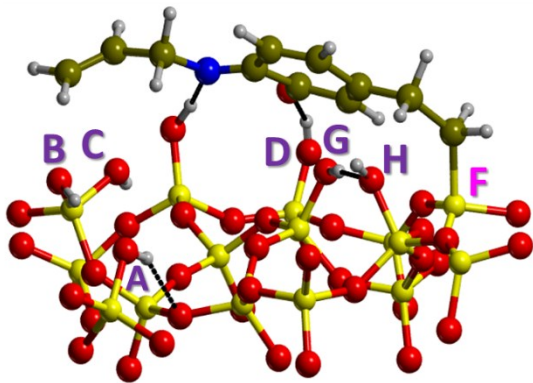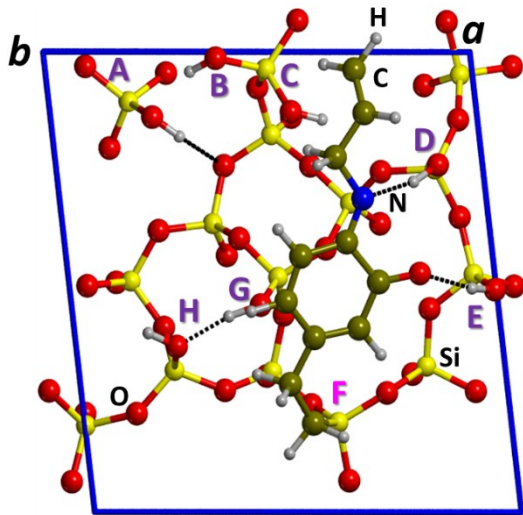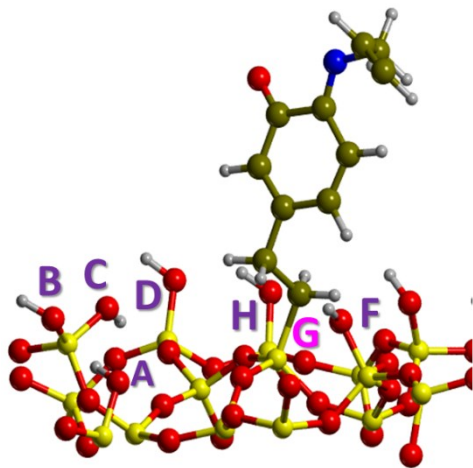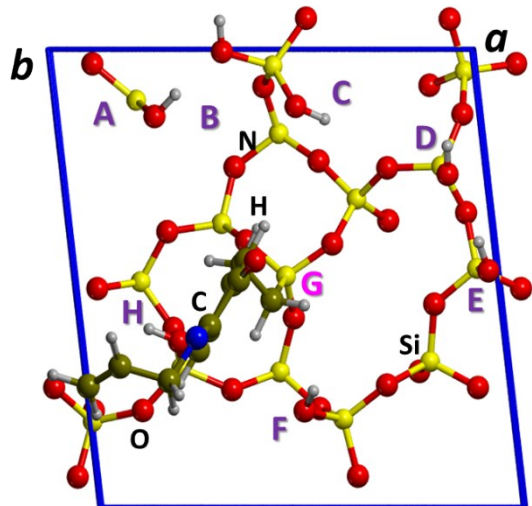

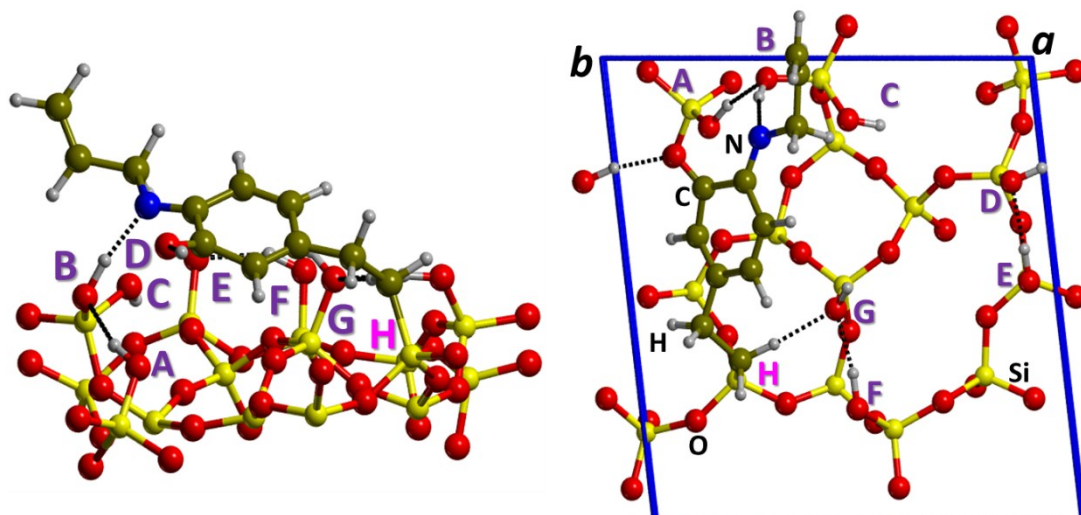

**Figure ESI2.** Side (left) and top (right) view of the imine products (see eq. 2) starting from different mono-functionalized models, labelled from B to H. Color code for atoms: silicon in yellow, oxygen in red, hydrogen in light grey, carbon in green, nitrogen in blue. H-bonds as black dotted lines; the label of the functionalized silanol in pink.
